1 **Antiviral activity of plant juices and green tea against SARS-CoV-2 and influenza virus *in vitro***

2

3 Bruno Frank<sup>1</sup>, Carina Conzelmann<sup>2</sup>, Tatjana Weil<sup>2</sup>, Rüdiger Groß<sup>2</sup>, Peggy Jungke<sup>3</sup>, Maren Eggers<sup>4</sup>,

4 Janis A. Müller<sup>2</sup>, Jan Münch<sup>2</sup>, Uwe Kessler<sup>1\*</sup>

5

6 <sup>1</sup> CogniVerde GmbH Groß-Umstadt/Kleinrinderfeld, Germany

7 <sup>2</sup> Institute of Molecular Virology, Ulm University Medical Center, Ulm, Germany

8 <sup>3</sup> Technische Universität Dresden, Medical Faculty Carl Gustav Carus, Dresden, Germany

9 <sup>4</sup> Labor Prof. Dr. G. Enders MVZ GbR, Stuttgart, Germany

10

11 \*Corresponding author:

12 UK@CogniVerde.de, CogniVerde GmbH Groß-Umstadt/Kleinrinderfeld, Germany

13

14 **Running title:** Green tea and juices against viruses

15

16 **Keywords:** COVID-19, vaccinia virus, adenovirus, transmission, oral rinses, green tea (*Camellia*

17 *sinensis*), black chokeberry (*Aronia melanocarpae*), pomegranate (*Punica granatum*), elderberry

18 (*Sambucus nigra*), phytomedicine

## 19    **Abstract**

20    Many plant juices, extracts and teas have been shown to possess antiviral activity. We here analyzed  
 21    the virucidal activity of black chokeberry (*Aronia melanocarpa*), pomegranate (*Punica granatum*),  
 22    and elderberry (*Sambucus nigra*) juice, as well as green tea (*Camellia sinensis*) against different  
 23    respiratory viruses. We found that all tested plant derived products effectively inactivated influenza  
 24    virus, whereas only chokeberry juice diminished SARS-CoV-2 and vaccinia virus infectivity. None of  
 25    the products inactivated non-enveloped human adenovirus type 5. Thus, black chokeberry juice exerts  
 26    virucidal activity against different enveloped viral pathogens under *in vitro* conditions. Whether  
 27    application of virucidal juices or green tea as oral rinses may lower viral loads in the oral cavity *in*  
 28    *vivo* remains to be evaluated.

## 29 Background

30 Respiratory viruses such as influenza viruses and coronaviruses pose a significant threat to global  
 31 health and are a substantial social, economic and healthcare burden, recently exemplified by the  
 32 coronavirus disease 2019 (COVID-19) pandemic caused by severe acute respiratory syndrome  
 33 coronavirus 2 (SARS-CoV-2) (1). For SARS-CoV-2, the long incubation period of up to 14 days,  
 34 subclinical course and high transmissibility before onset of symptoms has led to unprecedented spread  
 35 around the globe (1, 2). Respiratory viruses initially infect the upper airways, both the naso- and  
 36 oropharyngeal areas, where they amplify, cause respiratory symptoms (3) and spread to new hosts.  
 37 Recent studies suggest gargling with commercial oral rinses may reduce virus spread and potentially  
 38 infection (4, 5). Several natural products also have direct antiviral activity or may ameliorate  
 39 symptoms of respiratory infections. Pomegranate (*Punica granatum*) (6) and black chokeberry  
 40 (*Aronia melanocarpa*) (7) extracts have been shown to be antivirally active against influenza viruses  
 41 *in vitro*, elderberry syrup (*Sambucus nigra*) has shown improved symptom relief in influenza patients  
 42 (8), and a meta-analysis showed that gargling green tea (*Camellia sinensis*) lowered the incidence of  
 43 influenza infections (9). Natural products with a broad-spectrum antiviral activity would therefore be  
 44 useful to reduce spread of respiratory viruses in the population, as they are inexpensive and rapidly  
 45 deployable. Here, we evaluated the *in vitro* virucidal activity of green tea and herbal juices with  
 46 prospective use as oral rinses against the enveloped respiratory viruses, SARS-CoV-2 and influenza A  
 47 virus (IAV) and the naked adenovirus type 5 (AdV5). We found that IAV is highly susceptible to  
 48 inactivation by all tested substances. SARS-CoV-2 was less affected, however, inactivated by  
 49 chokeberry juice and sensitive to green tea and pomegranate juice. AdV5 was resistant to most  
 50 products, but viral titers were slightly reduced by chokeberry juice. These findings underline the  
 51 potential of common plant derived food products to inactivate enveloped viruses *in vitro*, where  
 52 chokeberry juice was the most potent natural product tested herein. Whether chokeberry juice applied  
 53 as oral rinse may lower viral loads in the oral cavity *in vivo*, remains to be assessed.

## 54 **Methods**

### 55 *Herbal substances:*

56 Green tea (Bio-Grüntee Japan Sencha Tee-Gschwendner Nr. 700; pH 4.46) was prepared by infusing 3  
57 g of leaves with 0.1 g ascorbic acid (Sigma Aldrich) for 4 min in 300 ml freshly boiled water under  
58 gentle movement, followed by filtration. Black chokeberry juice (Bio-Aronia Direktsaft Fa. Aronia  
59 original L2719; pH: 3.69), pomegranate juice (Satower Granatapfelsaft Direktsaft klar; pH: 2.99), and  
60 elderberry juice (Satower Fliederbeersaft; pH: 4.13) with valid best before date were kept refrigerated  
61 until use.

### 62 *Cell culture*

63 Vero E6 (*Cercopithecus aethiops* derived epithelial kidney) cells were grown in Dulbecco's modified  
64 Eagle's medium (DMEM, Gibco) which was supplemented with 2.5% heat-inactivated fetal calf  
65 serum (FCS), 100 units/ml penicillin, 100 µg/ml streptomycin, 2 mM L- glutamine, 1 mM sodium  
66 pyruvate, and 1x non-essential amino acids. Madin Darby canine kidney cells (MDCK) and A549  
67 (adenocarcinomic human alveolar basal epithelial) cells were grown in minimal essential medium with  
68 Earle's salts (EMEM; Biochrom AG, Berlin, Germany) supplemented with 1% non-essential  
69 aminoacids (Biochrom AG, Berlin, Germany), 10% FCS. BHK-21 (*Mesocricetus auratus* kidney)  
70 cells were grown in DMEM (CCPro) with 10% FCS. For experiments, cells were seeded in medium  
71 containing 2% FCS. Cells were incubated at 37°C in a 5% CO<sub>2</sub> humidified incubator.

### 72 *Virus test strains and cultivation*

73 Virus was propagated by inoculation of respective target cells and culturing until strong cytopathic  
74 effect was visible. The supernatant was then harvested, centrifuged to deplete cellular debris, aliquoted  
75 and stored at -80°C as virus stocks. Modified vaccinia virus Ankara (provided from the Institute of  
76 Animal Hygiene and Veterinary Public Health of the University Leipzig) was passaged on BHK-21  
77 cells (provided by Friedrich Löffler institute), influenza A virus A/H1N1/Brisbane/59/2007 (Novartis  
78 Vaccines and Diagnostics GmbH & Co. KG) on MDCK cells (ATCC), adenovirus type 5, strain  
79 adenoid 75 (kindly provided by Prof. Sauerbrei, University of Jena, Jena, Germany) on A549 cells

(ATCC) and SARS-CoV-2 BetaCoV/France/IDF0372/2020 (obtained through European Virus Archive global) on Vero E6 cells (ATCC).

## *Infection assays*

To determine the virucidal activity of the herbal substances, they were mixed with the respective virus, incubated for a specified contact time at room temperature, and the remaining infectivity determined by tissue culture infectious dose 50 (TCID<sub>50</sub>) endpoint titration. This quantitative suspension test as described in EN 14476 (10) was performed for Modified vaccinia virus Ankara (MVA), influenza A virus (IAV) and adenovirus type 5 (AdV5) by incubating the respective virus with chokeberry, elderberry, or pomegranate juice, green tea, or buffer as control. Briefly, the efficacy of the tested products was examined as an 80% solution in the presence of 10% interfering substance (5% (w/v) BSA Fraction V (Sigma Aldrich), 0.4% (w/v) Mucin bovine Glandula submandibularis Type I-S (Sigma Aldrich), 5% (w/v) yeast extract (Sigma Aldrich)). SARS-CoV-2 was analyzed in 90% product. After the specified contact time, the test mixture was serially diluted 10-fold and titrated onto a 96 microtiter plate containing a confluent monolayer of the respective target cells in sextuplicates and the cells cultured until strong CPE was visible. IAV infected cells were additionally immunostained. Cells were then examined with a light microscope, the infected wells counted, and TCID<sub>50</sub> calculated according to Spearman-Kaerber. If the cytotoxicity of the compound succeeded the lower limit of quantification (LLOQ), the titer was adjusted accordingly. The virucidal activity was determined by the difference of the logarithmic titer of the virus control minus the logarithmic titer of the virus incubated with the substance to test.

# **Results**

To assess the virucidal potential of four plant-derived products, we performed a quantitative suspension test using MVA (EN 14476 (10)) which is a resilient surrogate virus that is used for the validation of virucidal disinfectants against all enveloped viruses according to the European Guidance on the Biocidal Products Regulation (11). While no reduction in viral titer was observed upon incubation with control buffer, 5-minute incubation with chokeberry juice, elderberry juice, pomegranate juice, or green tea yielded a 3.17, 0.67, 1.0 or 1.0 log<sub>10</sub> decrease in infectivity, respectively (Figure 1, Table 1), indicating that the tested products are generally active against enveloped viruses. An incubation time of 20 minutes was only marginally more potent, suggesting a rapid acting antiviral effect. We then analyzed the two respiratory enveloped viruses responsible for the “swine flu” in 2009/2010 and the ongoing COVID-19 pandemic, IAV and SARS-CoV-2, respectively, as well as AdV5 as a naked control virus. A 5-minute incubation with chokeberry juice yielded most potent antiviral activities and inactivated IAV, SARS-CoV-2 and also AdV5 to 99.99%, 96.98%, and 93.23%, respectively (Figure 1, Table 1). IAV was most susceptible to all products and infectivity reduced >99% by elderberry juice, pomegranate juice and green tea. SARS-CoV-2 titers were reduced approximately 80% by pomegranate juice and green tea already after 1-minute incubation, however, unaffected by elderberry juice, corresponding to the results obtained with the more resistant surrogate MVA. The naked AdV5 was resistant to three out of four products, however, susceptible to chokeberry juice (Figure 1, Table 1). In summary, IAV is highly susceptible to all analyzed products, whereas SARS-CoV-2 can be efficiently inactivated by chokeberry juice and is to a lower level affected by pomegranate juice or green tea.

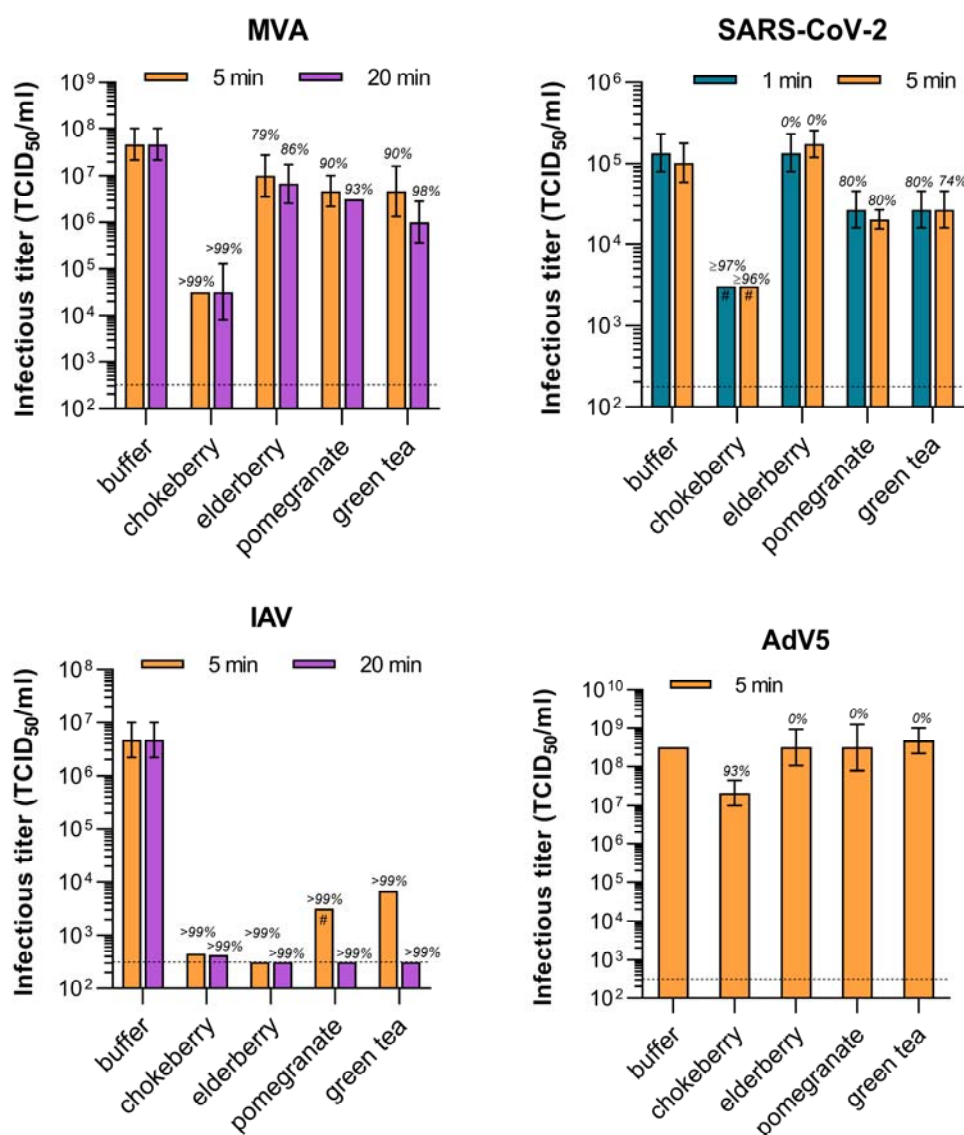

**Figure 1: Virucidal activity of natural products against MVA, IAV, SARS-CoV-2 and AdV5.** MVA, IAV (A/H1N1/Brisbane/59/2007), SARS-CoV-2 (BetaCoV/France/IDF0372/2020), or AdV5 (adenoid 75) were incubated with the plant derived products for indicated contact times before serial titration and inoculation of target cells. Viral titers were determined by monitoring cytopathic effect and calculated as tissue culture infectious dose 50 (TCID<sub>50</sub>) according to Spearman-Kaerber. The lower limit of quantification (LLOQ) is defined by limit of titration (dotted line) or cytotoxicity of the compound (#). Error bars indicate standard deviation and italics above corresponding bars the decrease of titers compared to control.

**Table 1: Antiviral activity of natural products against MVA, IAV, SARS-CoV-2 and AdV5.**  
Log<sub>10</sub> reduction factor and antiviral activity of chokeberry, elderberry, pomegranate juice and green tea against MVA, IAV, SARS-CoV-2 and AdV5 after indicated contact times. MVA, Modified vaccinia virus Ankara; IAV, influenza A virus (A/H1N1/Brisbane/59/2007); SARS-CoV-2, severe acute respiratory syndrome coronavirus 2 (BetaCoV/France/IDF0372/2020); AdV5 adenovirus type 5 (adenoid 75).

| virus      | contact time (min) |                                    | control     | chokeberry    | elderberry  | pomegranate | green tea   |
|------------|--------------------|------------------------------------|-------------|---------------|-------------|-------------|-------------|
| MVA        | 5                  | titer                              | 7.67 ± 0.33 | 4.50 ± 0.00   | 7.00 ± 0.45 | 6.67 ± 0.33 | 6.67 ± 0.54 |
|            |                    | log <sub>10</sub> reduction factor |             | 3.17          | 0.67        | 1.00        | 1.00        |
|            |                    | infectivity reduction (%)          |             | 99.93         | 78.62       | 90.00       | 90.00       |
|            | 20                 | titer                              | 7.67 ± 0.33 | 4.50 ± 0.60   | 6.83 ± 0.42 | 6.50 ± 0.00 | 6.00 ± 0.45 |
|            |                    | log <sub>10</sub> reduction factor |             | 3.17          | 0.84        | 1.17        | 1.67        |
|            |                    | infectivity reduction (%)          |             | 99.93         | 85.55       | 93.24       | 97.86       |
| IAV        | 5                  | titer                              | 6.67 ± 0.33 | 2.66 ± 0.0    | ≤ 2.5 ± 0.0 | ≤ 3.5 ± 0.0 | 3.83 ± 0.0  |
|            |                    | log <sub>10</sub> reduction factor |             | 4.01          | ≥ 4.17      | ≥ 3.17      | 2.84        |
|            |                    | infectivity reduction (%)          |             | 99.99         | ≥ 99.99     | ≥ 99.93     | 99.86       |
|            | 20                 | titer                              | 6.67 ± 0.33 | 2.63 ± 0.0    | ≤ 2.5 ± 0.0 | ≤ 2.5 ± 0.0 | ≤ 2.5 ± 0.0 |
|            |                    | log <sub>10</sub> reduction factor |             | 4.04          | ≥ 4.17      | ≥ 4.17      | ≥ 4.17      |
|            |                    | infectivity reduction (%)          |             | 99.99         | ≥ 99.99     | ≥ 99.99     | ≥ 99.99     |
| SARS-CoV-2 | 1                  | titer                              | 5.13 ± 0.23 | ≤ 3.49 ± 0.00 | 5.13 ± 0.23 | 4.43 ± 0.23 | 4.43 ± 0.23 |
|            |                    | log <sub>10</sub> reduction factor |             | ≥ 1.64        | 0           | 0.70        | 0.70        |
|            |                    | infectivity reduction (%)          |             | ≥ 97.71       | 0           | 80.05       | 80.05       |
|            | 5                  | titer                              | 5.01 ± 0.24 | ≤ 3.49 ± 0    | 5.24 ± 0.16 | 4.31 ± 0.12 | 4.43 ± 0.23 |
|            |                    | log <sub>10</sub> reduction factor |             | ≥ 1.52        | 0           | 0.70        | 0.58        |
|            |                    | infectivity reduction (%)          |             | ≥ 96.98       | 0           | 80.05       | 73.70       |
| AdV5       | 5                  | titer                              | 8.50 ± 0.00 | 7.33 ± 0.33   | 8.50 ± 0.47 | 8.50 ± 0.60 | 8.67 ± 0.33 |
|            |                    | log <sub>10</sub> reduction factor |             | 1.17          | 0           | 0           | 0           |
|            |                    | infectivity reduction (%)          |             | 93.24         | 0           | 0           | 0           |



# Discussion

We examined and compared the virucidal activities of four natural beverages on a surrogate and three respiratory viruses and found that chokeberry juice, green tea and pomegranate juice reduced infectious titers of enveloped viruses with chokeberry juice being most efficient. The tested food products showed the highest antiviral efficacy against IAV, with  $\geq 4 \log_{10}$ , which corresponds to the effectiveness of typical disinfectants. The high susceptibility of IAV (H1N1), which is also a representative of influenza B and other influenza strains with regard to chemical stability, indicates low resilience of this virus family. SARS-CoV-2 behaved similar to the European model virus for enveloped viruses, MVA, and proved to be more resilient. Notably, activity against MVA is prerequisite for validation of general disinfectant property of chemicals according to the European Chemicals Agency (11) and suggestive of broad activity against all enveloped viruses. *In vitro* exposure of SARS-CoV-2 to chokeberry juice reduced viral titers by more than 96%. This inactivating activity is lower than that observed for oral rinses containing chemicals such as dequalinium chloride and benzalkonium chloride, povidone-iodine, or ethanol and essential oils that show titer reductions of >99.9% (5). Generally, differences in contact times did not have a strong influence on the efficiency of inactivation suggesting a rapid acting antiviral effect. As expected, infectivity of the non-enveloped adenovirus was not or marginally affected by the tested products.

The antiviral activities of the plant products can be based on an acidic pH that may directly inactivate virus particles or by (poly-)phenols such as catechins, tannins or flavonoids that can act on viral and cellular proteins (12, 13). For example, pomegranate polyphenols were shown to inhibit influenza viruses by acting on virion surface glycoproteins and causing structural damage to the virion (14). Similarly, green tea catechins have been shown to destroy the virion structure and *epigallocatechin gallate* aggregates virus particles to prevent their interaction with target cells (15). Catechins not only act on virus particles but have additionally been shown to prevent fusion by interfering with endosome acidification and viral enzymes. Similarly, *in silico* modeling has suggested that theaflavin-3,3'-digallat may prevent SARS-CoV-2 infection by interacting with its cellular receptor angiotensin converting enzyme 2 (ACE2) (13, 15). Of note, the composition of natural food products may vary

between batches, which might affect their antiviral efficiency. Nevertheless, the composition of various antivirally active components, acting by different mechanisms, may represent a potent mix interfering with virus infection. However, the underlying antiviral mechanism of the tested products herein remain to be identified.

Since viral replication, symptoms and transmission occur in the naso- and oropharyngeal area, reducing viral titers as early as possible might represent a proactive strategy to prevent infection, dissemination, disease, and spread. The herbal products tested in this *in vitro* study are commonly available food preparations that could be applied as convenient “oral rinses”. Antiseptic oral rinses containing membrane-damaging agents (i.e. ethanol, chlorhexidine, cetylpyridinium chloride, hydrogen peroxide and povidone-iodine) are used in various private or clinical situations for prophylactic and therapeutic purposes and have further been applied in the context of viral infections (4, 5). In contrast to these chemical preparations, green tea and herbal juices can be applied more frequently and may be simply swallowed. Gargling tea, tea extracts or plant juice followed by drinking has already been shown to lower the incidence of influenza virus infections, viral loads and symptoms (8, 9). However, whether similar effects may be observed with antivirally active chokeberry juice against SARS-CoV-2 remains to be addressed in future work. We would like to emphasize that our study was designed to determine the virucidal activity of chosen beverages under experimental *in vitro* conditions that do not reflect the more complex *in vivo* environment of the oral cavity. Thus, well controlled clinical studies are required to clarify whether application of plant juices may reduce viral loads in the oral cavity before any recommendations should be made.

## References:

1. Bar-On YM, Flamholz A, Phillips R, Milo R. 2020. SARS-CoV-2 (COVID-19) by the numbers. *Elife* 9:697–698.
2. Gandhi M, Yokoe DS, Havlir D V. 2020. Asymptomatic transmission, the achilles’ heel of current strategies to control Covid-19. *N Engl J Med* 382:2158–2160.
3. Hou YJ, Okuda K, Edwards CE, Martinez DR, Asakura T, Dinnon KH, Kato T, Lee RE, Yount BL, Mascenik TM, Chen G, Olivier KN, Ghio A, Tse L V., Leist SR, Gralinski LE, Schäfer A, Dang H, Gilmore R, Nakano S, Sun L, Fulcher ML, Livraghi-Butrico A, Nicely NI, Cameron M, Cameron C, Kelvin DJ, de Silva A, Margolis DM, Markmann A, Bartelt L, Zumwalt R, Martinez FJ, Salvatore SP, Borczuk A, Tata PR, Sontake V, Kimple A, Jaspers I, O’Neal WK,

- 196        Randell SH, Boucher RC, Baric RS. 2020. SARS-CoV-2 Reverse Genetics Reveals a Variable  
197        Infection Gradient in the Respiratory Tract. *Cell* 182:429-446.e14.
- 198    4.        O'Donnell VB, Thomas D, Stanton R, Maillard J-Y, Murphy RC, Jones SA, Humphreys I,  
199        Wakelam MJO, Fegan C, Wise MP, Bosch A, Sattar SA. 2020. Potential Role of Oral Rinses  
200        Targeting the Viral Lipid Envelope in SARS-CoV-2 Infection. *Function* 1:1-12.
- 201    5.        Meister TL, Brüggemann Y, Todt D, Conzelmann C, Müller JA, Groß R, Münch J, Krawczyk  
202        A, Steinmann JJ, Steinmann JJ, Pfaender S, Steinmann E. 2020. Virucidal Efficacy of Different  
203        Oral Rinses Against Severe Acute Respiratory Syndrome Coronavirus 2. *J Infect Dis*  
204        222:1289-1292.
- 205    6.        Haidari M, Ali M, Ward Casscells S, Madjid M. 2009. Pomegranate (*Punica granatum*)  
206        purified polyphenol extract inhibits influenza virus and has a synergistic effect with  
207        oseltamivir. *Phytomedicine* 16:1127-1136.
- 208    7.        Park S, Kim J Il, Lee I, Lee S, Hwang MW, Bae JY, Heo J, Kim D, Han SZ, Park MS. 2013.  
209        *Aronia melanocarpa* and its components demonstrate antiviral activity against influenza  
210        viruses. *Biochem Biophys Res Commun* 440:14-19.
- 211    8.        Zakay-Rones Z, Thom E, Wollan T, Wadstein J. 2004. Randomized study of the efficacy and  
212        safety of oral elderberry extract in the treatment of influenza A and B virus infections. *J Int*  
213        *Med Res* 32:132-140.
- 214    9.        Ide K, Yamada H, Kawasaki Y. 2016. Effect of gargling with tea and ingredients of tea on the  
215        prevention of influenza infection: A meta-analysis. *BMC Public Health* 16:1-7.
- 216    10.        E DIN EN 14476: 2011-12 Chemische Desinfektionsmittel und Antiseptika – Quantitativer  
217        Suspensionsversuch Viruzidie für in der Humanmedizin verwendete Desinfektionsmittel und  
218        Antiseptika – Prüfverfahren und Anforderungen (Phase 2/Stufe 1). Beuth-Verlag, Berlin Wien  
219        Zürich.
- 220    11.        European Chemicals Agency. 2018. Guidance on the Biocidal Products Regulation: Volume II  
221        Efficacy - Assessment and Evaluation (Parts B + C).
- 222    12.        Hensel A, Bauer R, Heinrich M, Spiegler V, Kayser O, Hempel G, Kraft K. 2020. Challenges  
223        at the Time of COVID-19: Opportunities and Innovations in Antivirals from Nature. *Planta*  
224        *Med* 86:659-664.
- 225    13.        Mhatre S, Srivastava T, Naik S, Patravale V. 2020. Antiviral activity of green tea and black tea  
226        polyphenols in prophylaxis and treatment of COVID-19: A review. *Phytomedicine* 153286.
- 227    14.        Sundararajan A, Ganapathy R, Huan L, Dunlap JR, Webby RJ, Kotwal GJ, Sangster MY.  
228        2010. Influenza virus variation in susceptibility to inactivation by pomegranate polyphenols is  
229        determined by envelope glycoproteins. *Antiviral Res* 88:1-9.
- 230    15.        Xu J, Xu Z, Zheng W. 2017. A review of the antiviral role of green tea catechins. *Molecules*  
231        22:1-18.

232
